# Supplementary material for: Dramatic improvement in the stability and mechanism of high-performance inverted polymer solar cells featuring a solution-processed buffer layer
Source: Royal Society of Chemistry journal article supplement (doi:10.1039/d2nr05847b), 2023-01-01
Supplement: d2nr05847b1.pdf [file d2nr05847b1.pdf]

## Supporting Information

### **Dramatic improvement in stability of high-performance inverted polymer solar cells featuring solution-processed buffer layer**

*Yun-Ming Sung,<sup>1,2</sup> Cheng-Hsun-Tony Chang,<sup>3</sup> Cheng-Si Tsao,<sup>\*1</sup> Hua-Kai Lin,<sup>1</sup> Hou-Chin Cha,<sup>1</sup>  
Pei-Cheng Jiang,<sup>3</sup> Tian-Cheng Liu,<sup>1</sup> Kang-Wei Chang,<sup>4</sup> Yu-Ching Huang,<sup>\*4</sup> Jyh-Shen Tsay,<sup>\*5</sup>*

<sup>1</sup>Institute of Nuclear Energy Research, Longtan, Taoyuan 32546, Taiwan.

<sup>2</sup>Institute of Atomic and Molecular Sciences, Academia Sinica, Taipei 10617, Taiwan.

<sup>3</sup>Department of Electronic Engineering, Minghsin University of Science and Technology,  
Hsinchu 30401, Taiwan

<sup>4</sup>Department of Materials Engineering, Ming-Chi University of Technology, New Taipei City  
24301, Taiwan.

<sup>5</sup>Department of Physics, National Taiwan Normal University. Taipei 116, Taiwan.

\*Corresponding author:

E-mail: [cstsao@iner.gov.tw](mailto:cstsao@iner.gov.tw) (Cheng-Si Tsao); [huangyc@mail.mcut.edu.tw](mailto:huangyc@mail.mcut.edu.tw) (Yu-Ching Huang)

[jtsay@phy.ntnu.edu.tw](mailto:jtsay@phy.ntnu.edu.tw) (Jyh-Shen Tsay)

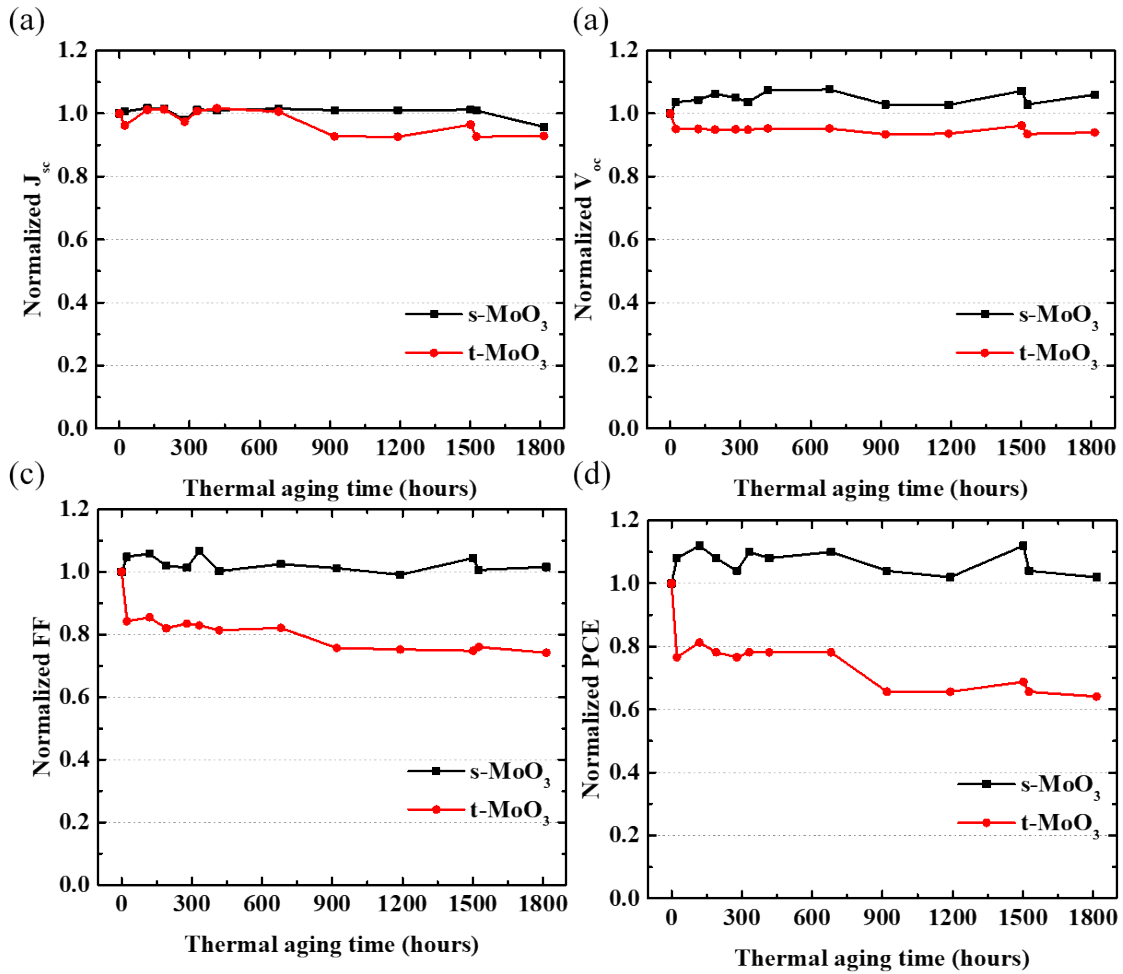

Fig. S1. The variation of photovoltaic characteristics with thermally aging time for the inverted PTB7:PC<sub>71</sub>BM devices with t-MoO<sub>3</sub> HTL and s-MoO<sub>3</sub> HTL, respectively. All the devices are thermally aged at 65°C in the dark nitrogen glove box.

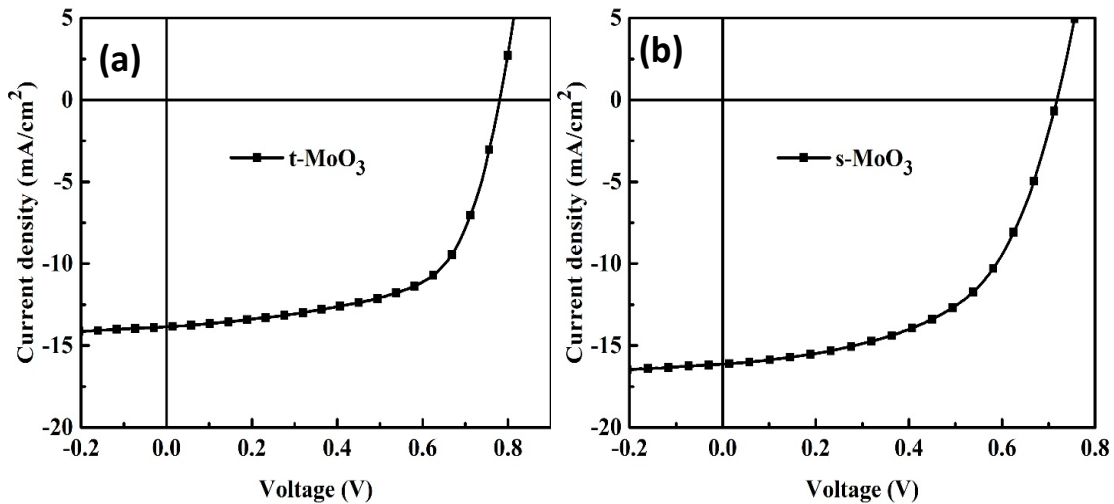

Fig. S2 (a) The current density-voltage curve of the PTB7:PC<sub>71</sub>BM device with t-MoO<sub>3</sub> without thermal aging (b) The current density-voltage curve of the PTB7:PC<sub>71</sub>BM device with s-MoO<sub>3</sub> without thermal aging.

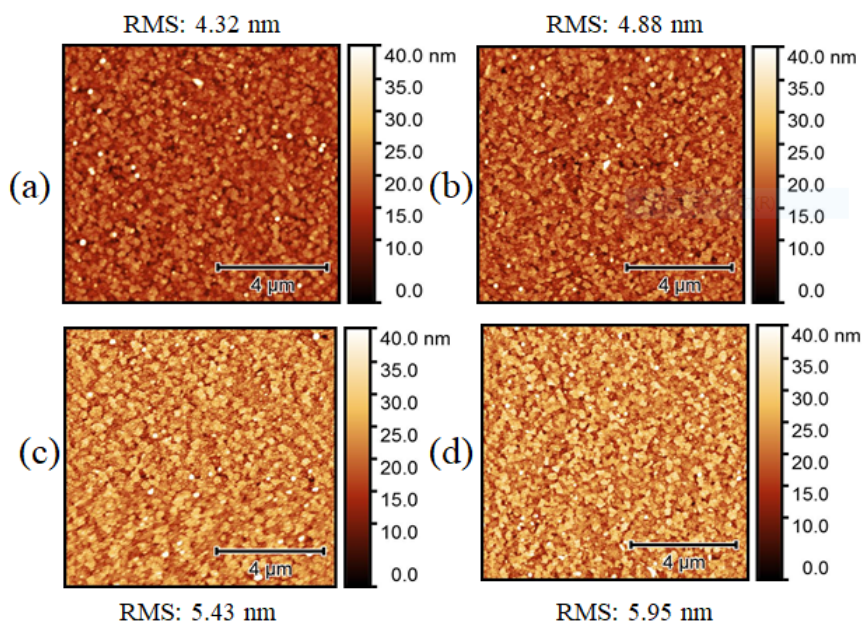

Fig. S3. Topographies of ITO/8 nm t-MoO<sub>3</sub> (a) without and (b) with aging and ITO/15 nm s-MoO<sub>3</sub> (c) without and (d) with aging. The thermal aging is at 85 °C for 100 h. The scale bar is 4 μm. The RMS of ITO is 3.00 nm.

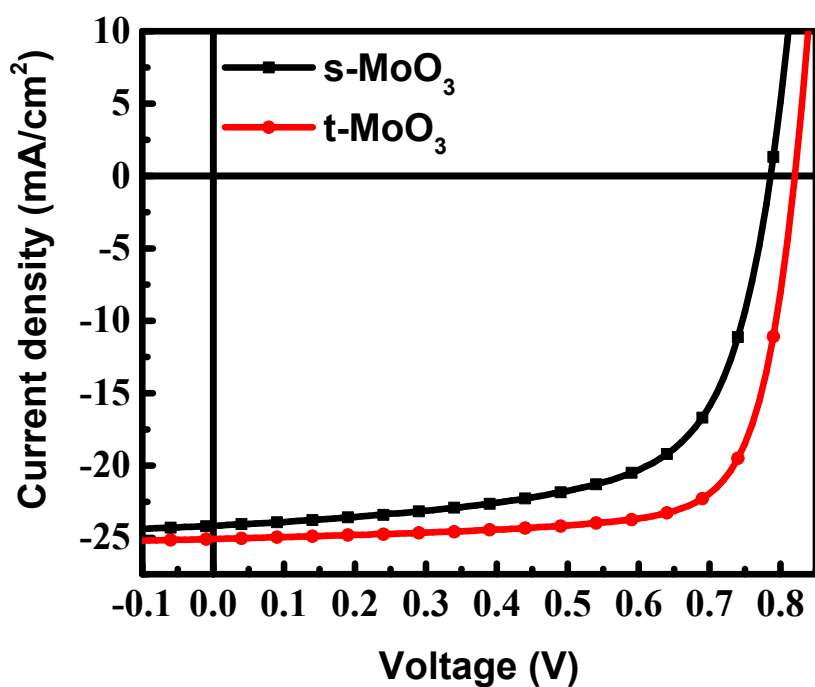

Fig. S4 Current density-voltage curves of t-MoO<sub>3</sub>- and s-MoO<sub>3</sub>-based PM6:Y6 PSCs.

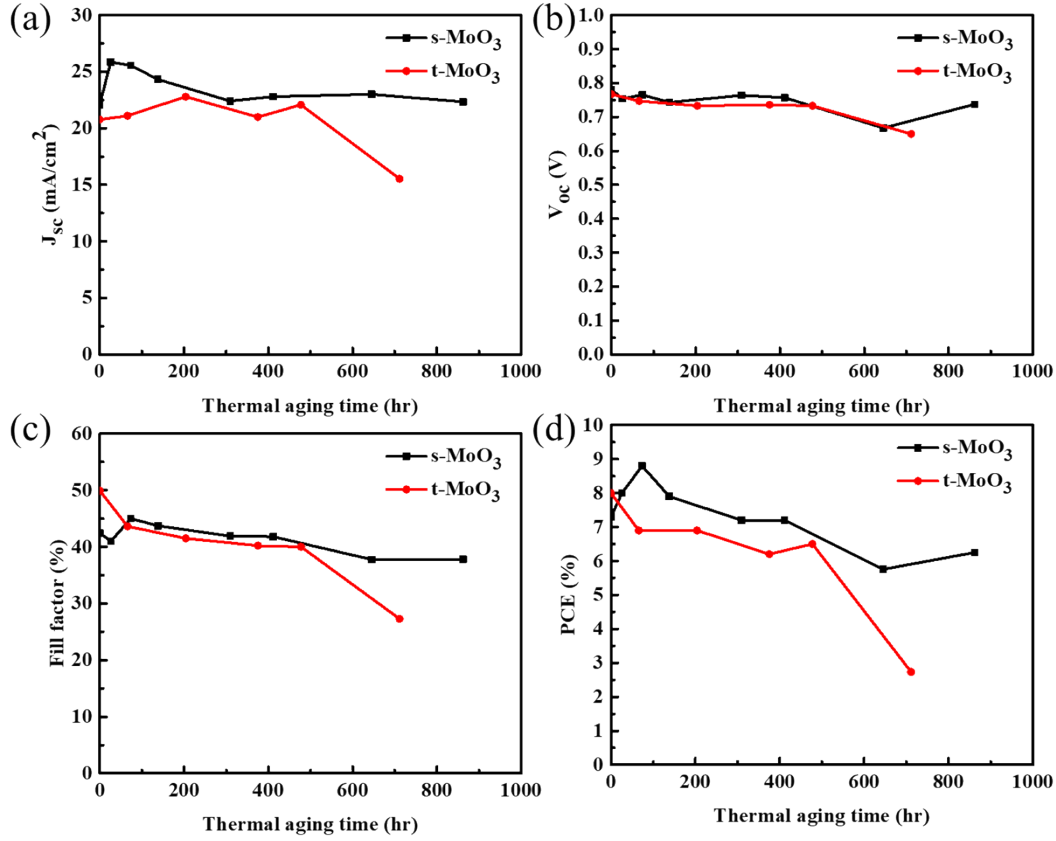

Fig. S5 Variation in the photovoltaic characteristics with respect to the thermal aging time for inverted PM6:Y6 devices incorporating t-MoO<sub>3</sub> and s-MoO<sub>3</sub> HTLs, respectively.

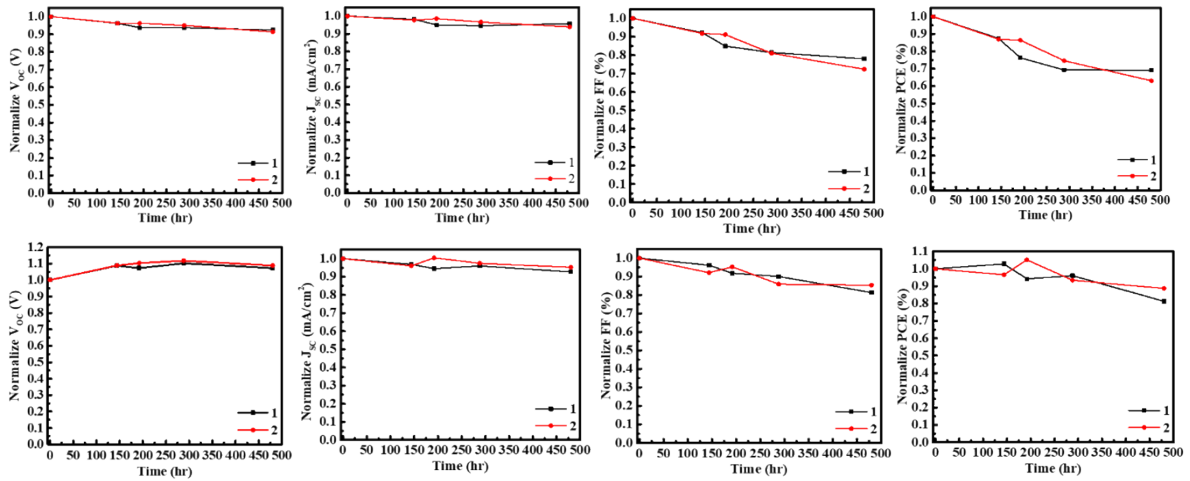

Fig. S6 Variation in the normalized photovoltaic characteristics with respect to the thermal aging time for inverted t-MoO<sub>3</sub>-based and s-MoO<sub>3</sub>-based PM6:Y6 devices.

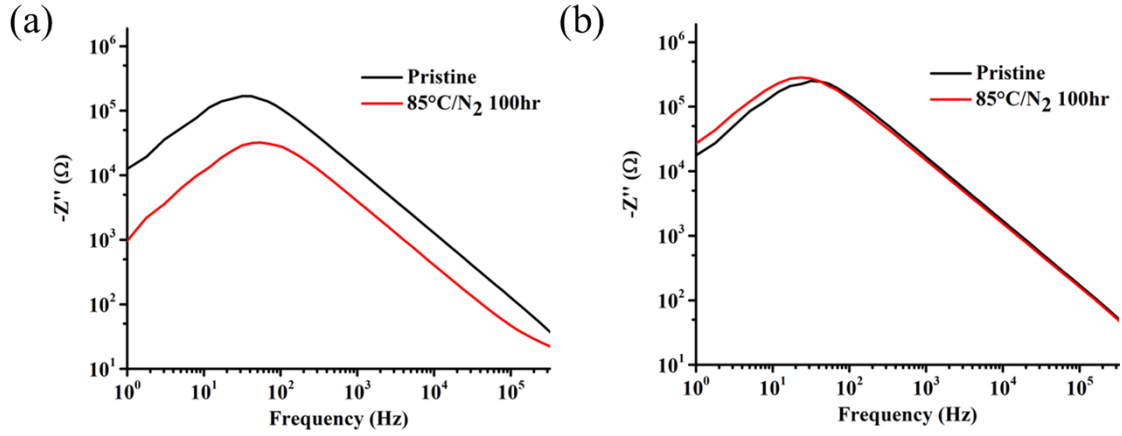

Fig. S7 (a) and (b) are the imaginary component ( $-Z''$ )-frequency plots corresponding to Fig. 2(c) and (d), respectively.

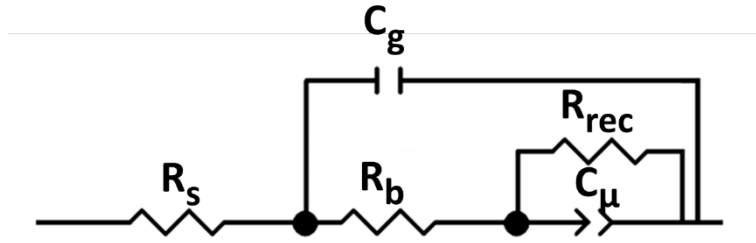

Fig. S8 Equivalent circuit of bulk heterojunction PSC for model analysis.

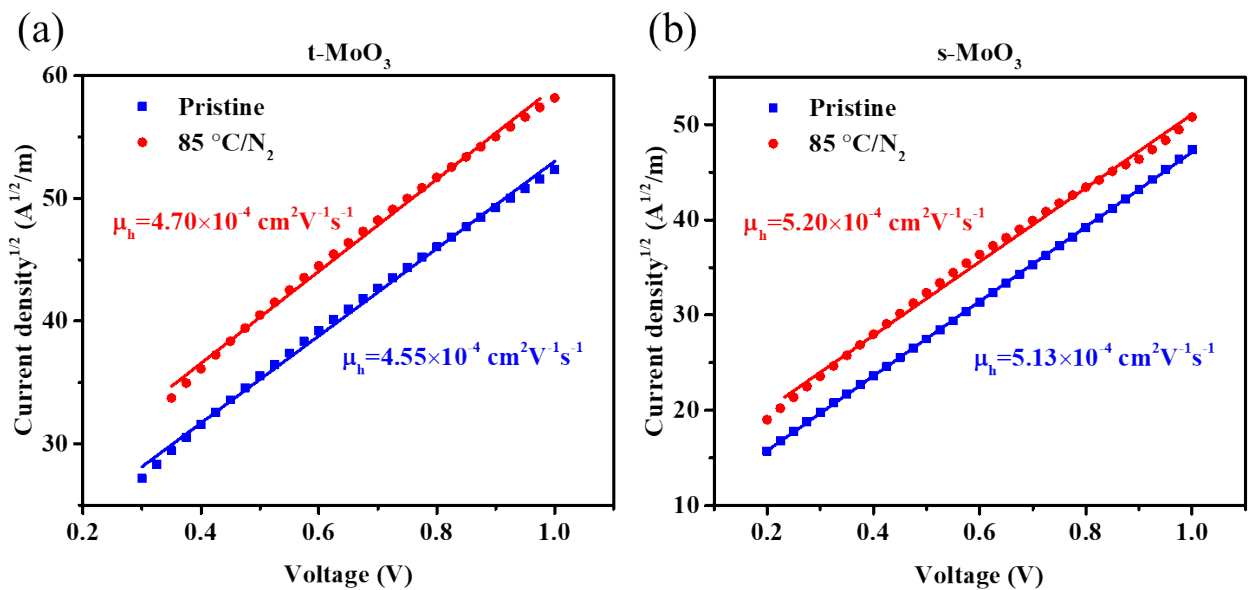

Fig. S9 Current density-voltage curves and hole mobility values of the hole only devices based on (a)  $t\text{-MoO}_3$  and (b)  $s\text{-MoO}_3$  as HTL before and after thermal aging at  $85^\circ\text{C}$  in nitrogen for 100 hours.

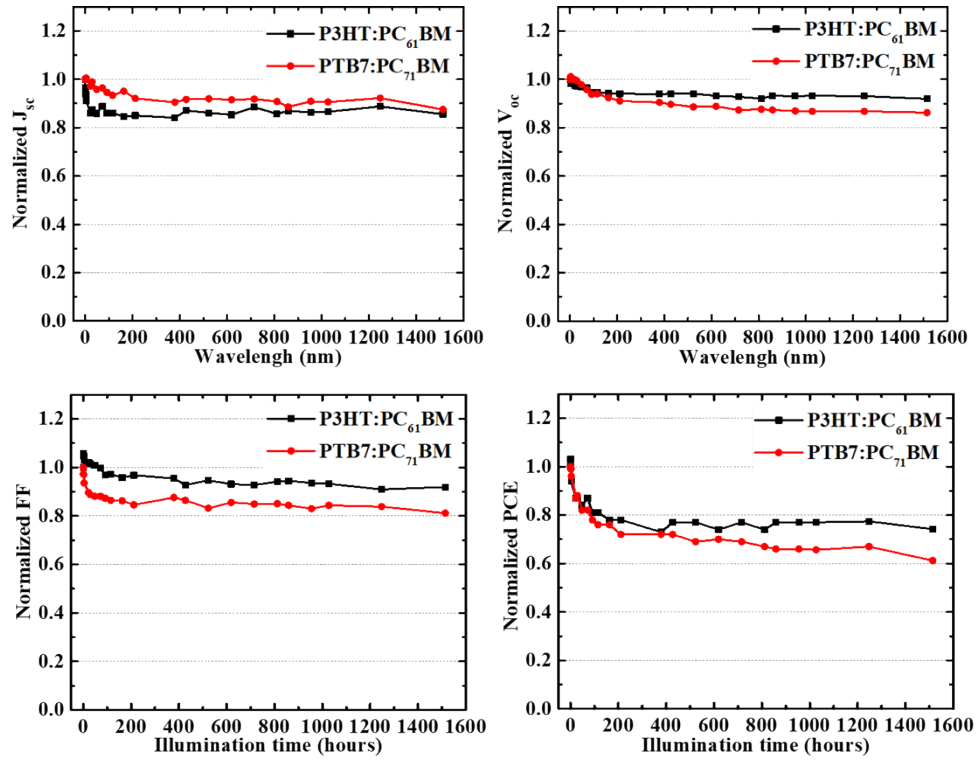

Fig. S10 Variation of photovoltaic parameters for the encapsulated inverted PTB7:PC<sub>71</sub>BM and P3HT:PC<sub>61</sub>BM devices with s-MoO<sub>3</sub> HTLs with aging time under the continuous AM 1.5G solar illumination with UV filter.

Table S1 Performance characteristics of t-MoO<sub>3</sub>- and s-MoO<sub>3</sub>-based PM6:Y6 PSCs. Values are for the highest-PCE device, and the average data are obtained from 10 devices in the brackets.

| HTL                | Voc (V)     | Jsc (mA/cm <sup>2</sup> ) | FF (%)       | PCE (%)      |
|--------------------|-------------|---------------------------|--------------|--------------|
| t-MoO <sub>3</sub> | 0.81        | 26.02                     | 72.93        | 15.35        |
|                    | (0.81±0.01) | (25.16±0.67)              | (70.61±3.58) | (14.33±1.18) |
| s-MoO <sub>3</sub> | 0.79        | 24.14                     | 64.80        | 12.28        |
|                    | (0.78±0.00) | (23.46±0.48)              | (64.11±1.23) | (11.80±0.36) |

Table S2. Photovoltaic characteristics of inverted t-MoO<sub>3</sub>- and s-MoO<sub>3</sub>-based PM6:Y6 devices with PCE > 11%.

| HTL                          | Device | V <sub>OC</sub> (V) | J <sub>SC</sub> (mA/cm <sup>2</sup> ) | FF (%)      | PCE (%)     |
|------------------------------|--------|---------------------|---------------------------------------|-------------|-------------|
| Evaporation MoO <sub>3</sub> | 1      | 0.81                | 25.14                                 | 72.13       | 14.60       |
|                              |        | 0.79 ±0.02          | 25.02 ±0.42                           | 63.31 ±6.33 | 12.54 ±1.62 |
|                              | 2      | 0.81                | 26.02                                 | 72.93       | 15.35       |
|                              |        | 0.81 ±0.01          | 25.16 ±0.67                           | 70.61 ±3.58 | 14.33 ±1.18 |
| H-MoO <sub>3</sub>           | 1      | 0.70                | 26.70                                 | 67.17       | 12.59       |
|                              |        | 0.69 ±0.02          | 26.04 ±0.51                           | 63.86 ±3.51 | 11.56 ±1.04 |
|                              | 2      | 0.68                | 26.06                                 | 66.49       | 11.78       |
|                              |        | 0.69 ±0.02          | 25.58 ±0.55                           | 61.91 ±6.74 | 10.85 ±1.17 |

Table S3 Electric parameters determined by model fitting for the t-MoO<sub>3</sub>- and s-MoO<sub>3</sub>-based PTB7:PC<sub>71</sub>BM/8 PSCs before and after annealing at 85 °C for 100 h

| HTL                | Condition                  | R <sub>s</sub><br>(Ω) | R <sub>b</sub><br>(Ω) | C <sub>g</sub><br>(10 <sup>-8</sup> F) | C <sub>μ</sub><br>(10 <sup>-8</sup> F) | R <sub>rec</sub><br>(kΩ) | τ <sub>avg</sub><br>(ms) |
|--------------------|----------------------------|-----------------------|-----------------------|----------------------------------------|----------------------------------------|--------------------------|--------------------------|
| t-MoO <sub>3</sub> | Pristine                   | 13.56                 | 318.7                 | 1.29                                   | 9.71                                   | 39.9                     | 2.89                     |
|                    | 85°C/N <sub>2</sub> 100 hr | 69.82                 | 50.2                  | 3.87                                   | 6.20                                   | 17.2                     | 0.74                     |
| s-MoO <sub>3</sub> | Pristine                   | 11.04                 | 396.3                 | 0.82                                   | 0.96                                   | 109.4                    | 0.73                     |
|                    | 85°C/N <sub>2</sub> 100 hr | 10.51                 | 126.5                 | 1.04                                   | 0.22                                   | 445.6                    | 0.68                     |
